# Supplementary material
Source: Springer Nature journal article supplement (https://www.springermedizin.de/resource/supplementary/40478_2013_134_MOESM1_ESM.pdf/25658058)
Supplement: MOESM1 [file 25658058]

**Title:** The *Arctic APP* mutation leads to Alzheimer's disease pathology with highly variable topographic deposition of differentially truncated A $\beta$

**Journal:** Acta Neuropathologica Communications

**Authors:** Hannu Kalimo<sup>1</sup>, Maciej Lalowski, Nenad Bogdanovic, Ola Philipson, Thomas D. Bird, David Nochlin, Gerard D. Schellenberg, RoseMarie Brundin, Tommie Olofsson, Marc Baumann, Oliver Wirths, Thomas A. Bayer, Lars N.G. Nilsson, Hans Basun, Lars Lannfelt, Martin Ingelsson

**Corresponding author:** <sup>1</sup>Hannu Kalimo, Department of Pathology, University and University Hospital of Helsinki, Helsinki, Finland,

**E-mail:** hannu.kalimo@helsinki.fi

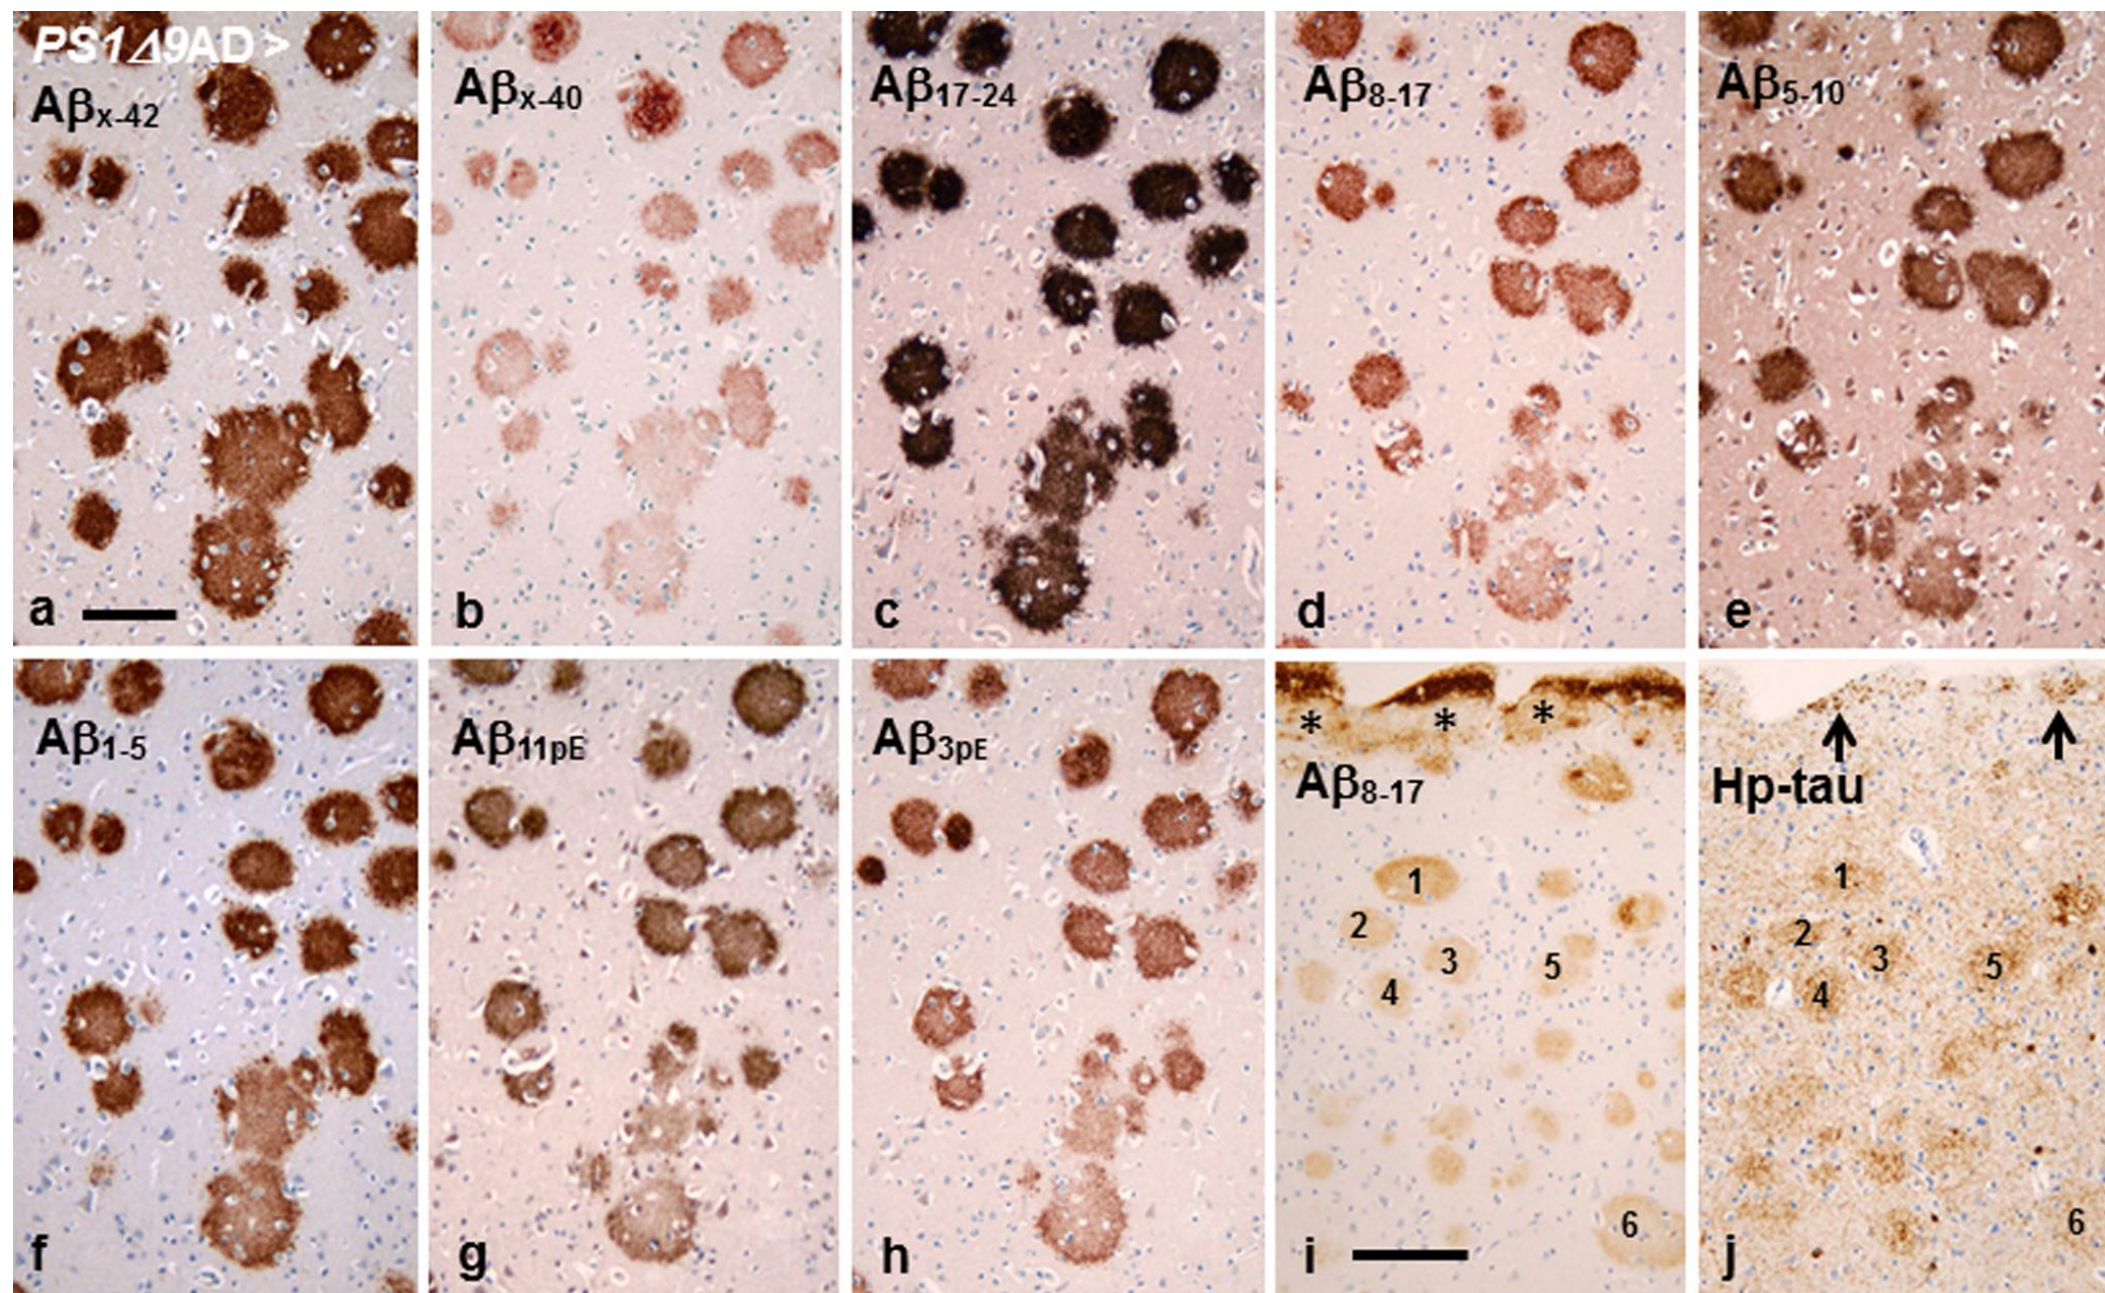

**Suppl. Fig. 9** Immunostainings of semiconsecutive sections from a *PS1Δ9* AD patient's frontal (**a-h**) and temporal (**i** and **j**) cortex. The cotton wool plaques are similarly rounded structures as Arctic plaques, but the different antibodies stain them homogeneously, although with different intensities. The strong staining with abAβ<sub>x-42</sub> (**a**) suggests that majority of Aβ terminates at aa 42, whereas Aβ<sub>x-40</sub> (**b**) species are scarce. N-termini appear to be markedly variable including considerable amounts of N-terminally truncated Aβ species starting with pyroglutamate (Aβ<sub>11pE</sub> or Aβ<sub>3pE</sub>; **g** and **h**). The homogeneous staining suggests that the variably truncated Aβ species are relatively evenly distributed within the plaques. **i** and **j**: Sections from temporal cortex show accumulation of hp-tau positive NTs within Aβ plaques (six plaques marked with numbers). Note the NTs (arrows) also in the subpial Aβ-positive edging (asterisks) (*bar in a* 100 μm for **a-h**; *bar in i* 150 μm for **i** and **j**)
